# Supplementary material
Source: PubMed Central journal article supplement (PMC9243948)
Supplement: 41582_2022_690_MOESM1_ESM.pdf [file 41582_2022_690_MOESM1_ESM.pdf]

**Supplementary information**

---

**Barriers to implementation of evidence  
into clinical practice in low-resource  
settings**

---

In the format provided by the  
authors and unedited

**Supplementary Table 1** | Barriers to implementation of evidence-based recommendations for neurological conditions in clinical practice in low-resource settings

|                                                                                                             | <b>Pillars of the neurological quadrangle</b>                                                                                                                                                          |                                                                                                                       |                                                                                                         |                                                                                                             | <b>General/core</b> | <b>Mitigation strategies</b> |
|-------------------------------------------------------------------------------------------------------------|--------------------------------------------------------------------------------------------------------------------------------------------------------------------------------------------------------|-----------------------------------------------------------------------------------------------------------------------|---------------------------------------------------------------------------------------------------------|-------------------------------------------------------------------------------------------------------------|---------------------|------------------------------|
|                                                                                                             | <b>Surveillance and research</b>                                                                                                                                                                       | <b>Prevention</b>                                                                                                     | <b>Acute care</b>                                                                                       | <b>Rehabilitation</b>                                                                                       |                     |                              |
| <b>Description</b>                                                                                          | Monitoring of burden, trends, and determinants, public awareness and prioritization based on burden                                                                                                    | Primordial, primary and secondary prevention                                                                          | Early detection, early diagnosis, appropriate and timely care e.g. for stroke                           | Transdisciplinary therapy to aid recovery and improve quality of life and productivity                      |                     |                              |
| <b>Stages of the implementation cycle</b>                                                                   |                                                                                                                                                                                                        |                                                                                                                       |                                                                                                         |                                                                                                             |                     |                              |
| <b>Situational analysis: burden, evidence and gap analysis</b>                                              | Lack of high-quality data to assess the burden of disease, trends, and population-level impact of interventions                                                                                        | Lack of evidence-based characterization of modifiable risk and protective factors that can be targeted for prevention | Lack of context-specific data on practice gaps for acute care                                           | Lack of context-specific data on practice gaps for rehabilitation                                           |                     |                              |
| <b>Evidence generation: surveillance, randomized controlled trials, implementation science research</b>     | Lack of novel and efficient reliable and valid methods for generating regular frequent data on disease burden, DALYs and trend                                                                         | Lack of evidence-based interventions for primordial, primary, and secondary prevention                                | Lack of evidence-based interventions for acute care                                                     | Lack of evidence-based interventions for rehabilitation                                                     |                     |                              |
| <b>Content of interventions: concise evidence-based recommendations</b>                                     | Lack of prioritized consistent methods for generating regular frequent data on disease burden, disability-adjusted life years and trend based on consensus recommendations from high grade of evidence | Lack of prioritized consistent consensus recommendations for prevention based on high grade of evidence               | Lack of prioritized consistent consensus recommendations for acute care based on high grade of evidence | Lack of prioritized consistent consensus recommendations for rehabilitation based on high grade of evidence |                     |                              |
| <b>Political, legal, ethical, anthropologic and socioeconomic (PLEASE) cocreation and contextualization</b> | Lack of PLEASE contextualization of pragmatic solutions for improving research and surveillance                                                                                                        | Lack of PLEASE contextualization of pragmatic solutions for improving prevention                                      | Lack of PLEASE contextualization of pragmatic solutions for improving acute care                        | Lack of PLEASE contextualization of pragmatic solutions for improving rehabilitation                        |                     |                              |

|                                                                                                                                                                             |                                                                                                                                                                                                                                                          |                                                                                                                                                                                                     |                                                                                                                                                                                                                       |                                                                                                                                                                 |                                                                                                                                                                                                                                                                                                                                                    |                                                                                                                                                                                                                                                                                                                                                    |
|-----------------------------------------------------------------------------------------------------------------------------------------------------------------------------|----------------------------------------------------------------------------------------------------------------------------------------------------------------------------------------------------------------------------------------------------------|-----------------------------------------------------------------------------------------------------------------------------------------------------------------------------------------------------|-----------------------------------------------------------------------------------------------------------------------------------------------------------------------------------------------------------------------|-----------------------------------------------------------------------------------------------------------------------------------------------------------------|----------------------------------------------------------------------------------------------------------------------------------------------------------------------------------------------------------------------------------------------------------------------------------------------------------------------------------------------------|----------------------------------------------------------------------------------------------------------------------------------------------------------------------------------------------------------------------------------------------------------------------------------------------------------------------------------------------------|
| <b>Communication: multidirectional user-friendly dissemination channels to all stakeholders: physicians, providers, patients, populace, payers, policy makers, partners</b> | Lack of multidimensional involvement, communication, and empowerment of all stakeholders for effective implementation of solutions for improving surveillance                                                                                            | Lack of multidimensional involvement, communication, and empowerment of all stakeholders for effective implementation of solutions for improving prevention                                         | Lack of multidimensional involvement, communication, and empowerment of all stakeholders for effective implementation of solutions for improving acute care                                                           | Lack of multidimensional involvement, communication, and empowerment of all stakeholders for effective implementation of solutions for improving rehabilitation |                                                                                                                                                                                                                                                                                                                                                    |                                                                                                                                                                                                                                                                                                                                                    |
| <b>Evaluation of implementation and feedback from end-users and stakeholders</b>                                                                                            | Lack of framework for learning health systems, evaluating outcomes and impact of interventions for surveillance, prevention, acute care and prevention; identifying persisting gaps and designing new research to create new evidence address such needs |                                                                                                                                                                                                     |                                                                                                                                                                                                                       |                                                                                                                                                                 |                                                                                                                                                                                                                                                                                                                                                    |                                                                                                                                                                                                                                                                                                                                                    |
| <b>Levels of implementation</b>                                                                                                                                             |                                                                                                                                                                                                                                                          |                                                                                                                                                                                                     |                                                                                                                                                                                                                       |                                                                                                                                                                 |                                                                                                                                                                                                                                                                                                                                                    |                                                                                                                                                                                                                                                                                                                                                    |
| <b>Patient level</b>                                                                                                                                                        |                                                                                                                                                                                                                                                          | <ul style="list-style-type: none"> <li>-Poor brain health and mental capacity</li> <li>-Lack of awareness</li> <li>-Low health literacy</li> <li>-Poor risk factor screening and control</li> </ul> | <ul style="list-style-type: none"> <li>-Lack of awareness</li> <li>-Cultural and social believes causing delay presentation</li> <li>-Cost of treatment</li> <li>-Heavy traffic may hinder hyperacute care</li> </ul> | <ul style="list-style-type: none"> <li>-Cultural and social believes causing inappropriate long-term care</li> </ul>                                            | <ul style="list-style-type: none"> <li>-Low health literacy</li> <li>-Cultural beliefs</li> <li>-traditional/non-orthodox care systems</li> <li>-Accessibility</li> <li>-Low demand for rehabilitation services due to lack of awareness</li> <li>-Stigma</li> <li>-Poverty</li> <li>-Lack of education</li> <li>-Out-of-pocket payment</li> </ul> | <ul style="list-style-type: none"> <li>-Improve brain health</li> <li>-Health education from reliable sources/social media</li> <li>-Patient support group</li> <li>-Famous victim to help with education</li> <li>-Engagement of community</li> </ul>                                                                                             |
| <b>Provider level</b>                                                                                                                                                       | <ul style="list-style-type: none"> <li>-Unaware of health surveillance role</li> <li>- Overwhelming workload</li> </ul>                                                                                                                                  | <ul style="list-style-type: none"> <li>-Unaware of role in advocating for health to the public.</li> <li>-Overwhelming workload</li> </ul>                                                          | <ul style="list-style-type: none"> <li>-Lack of knowledge</li> <li>-Overwhelming workload</li> <li>-Insufficient local data lead to physician reluctance</li> <li>-Clinical inertia</li> </ul>                        | <ul style="list-style-type: none"> <li>-Lack of personnel</li> </ul>                                                                                            | <ul style="list-style-type: none"> <li>-Lack of knowledge</li> <li>-Clinical inertia</li> <li>-Overwhelming workload</li> <li>-Unaware of role on advocacy and disease prevention</li> </ul>                                                                                                                                                       | <ul style="list-style-type: none"> <li>-Education and training for health-care providers</li> <li>-Use technology to update their knowledge. digital tools, decision support tools</li> <li>-Improve local data collection</li> <li>-improve provider awareness about roles on advocacy and disease prevention</li> <li>- Telemedicine.</li> </ul> |

|                             |                                                                                                                                                                                                 |                                                                                                                                                                                                                                                                                                                                                                                                                                                                                            |                                                                                                                                                                                                                                                                                                                  |                                                                                                        |                                                                                                                                                                                                                                                                                                                                                                                                                                     |                                                                                                                                                                                                                                                                                                                                                                                                                                                                                                                                                                                                                                                                                                                                                                                                |
|-----------------------------|-------------------------------------------------------------------------------------------------------------------------------------------------------------------------------------------------|--------------------------------------------------------------------------------------------------------------------------------------------------------------------------------------------------------------------------------------------------------------------------------------------------------------------------------------------------------------------------------------------------------------------------------------------------------------------------------------------|------------------------------------------------------------------------------------------------------------------------------------------------------------------------------------------------------------------------------------------------------------------------------------------------------------------|--------------------------------------------------------------------------------------------------------|-------------------------------------------------------------------------------------------------------------------------------------------------------------------------------------------------------------------------------------------------------------------------------------------------------------------------------------------------------------------------------------------------------------------------------------|------------------------------------------------------------------------------------------------------------------------------------------------------------------------------------------------------------------------------------------------------------------------------------------------------------------------------------------------------------------------------------------------------------------------------------------------------------------------------------------------------------------------------------------------------------------------------------------------------------------------------------------------------------------------------------------------------------------------------------------------------------------------------------------------|
| <p><b>Systems level</b></p> | <ul style="list-style-type: none"> <li>-Stroke and other neurological conditions (epilepsy, dementia) are not set as priority</li> <li>-Limited budget for surveillance and research</li> </ul> | <ul style="list-style-type: none"> <li>-Unhealthy lifestyle and environment</li> <li>-Lack of implementation of policies designed to reduce unhealthy lifestyles including taxes on tobacco and alcohol, sugar and salt reduction, and trans-fat reduction</li> <li>-Lack of promotion of risk factor screening and an integrated non-communicable disease prevention social media (unfortunately, social media can be difficult to access in countries with limited resources)</li> </ul> | <ul style="list-style-type: none"> <li>-Unavailability of emergency management system for hyperacute and acute care</li> <li>-Limited access to investigations and treatment</li> <li>-Insufficient trained personnel</li> <li>-Cost of investigation and treatment</li> <li>-Lack of referral system</li> </ul> | <ul style="list-style-type: none"> <li>-Inadequate rehabilitation facilities and therapists</li> </ul> | <ul style="list-style-type: none"> <li>-Lack of trained health-care workers across different disciplines</li> <li>-Lack of equipment</li> <li>-Lack of medications</li> <li>-Lack of care pathways, protocols, and guidelines</li> <li>-Unhealthy lifestyle</li> <li>-Lack of adequate number of training institutions for health care workers</li> <li>-Poor allocation to health</li> <li>-Inadequate health insurance</li> </ul> | <ul style="list-style-type: none"> <li>-Prioritize neurological disorders as country burden</li> <li>-National/local data collection e.g. stroke registry and local pragmatic guidelines</li> <li>-Cost-effectiveness treatment analysis, budget relocation</li> <li>-Advocacy and endorsement by professional societies through establishment of political and economic case for interventions</li> <li>-Use of social media for advocacy and education</li> <li>-Telemedicine for patient selection</li> <li>-Infrastructure reorganization</li> <li>-Provide training to physicians and nurses</li> <li>-Policy to reduce unhealthy lifestyle</li> <li>-Promote risk factor screening e.g. blood pressure</li> <li>-Integrated programme for non-communicable disease prevention</li> </ul> |
|-----------------------------|-------------------------------------------------------------------------------------------------------------------------------------------------------------------------------------------------|--------------------------------------------------------------------------------------------------------------------------------------------------------------------------------------------------------------------------------------------------------------------------------------------------------------------------------------------------------------------------------------------------------------------------------------------------------------------------------------------|------------------------------------------------------------------------------------------------------------------------------------------------------------------------------------------------------------------------------------------------------------------------------------------------------------------|--------------------------------------------------------------------------------------------------------|-------------------------------------------------------------------------------------------------------------------------------------------------------------------------------------------------------------------------------------------------------------------------------------------------------------------------------------------------------------------------------------------------------------------------------------|------------------------------------------------------------------------------------------------------------------------------------------------------------------------------------------------------------------------------------------------------------------------------------------------------------------------------------------------------------------------------------------------------------------------------------------------------------------------------------------------------------------------------------------------------------------------------------------------------------------------------------------------------------------------------------------------------------------------------------------------------------------------------------------------|
